# Supplementary material for: From mononuclear to two-dimensional cobalt(ii) complexes based on a mixed benzimidazole–dicarboxylate strategy: syntheses, structures, and magnetic properties
Source: Royal Society of Chemistry journal article supplement (doi:10.1039/c8ce01931b), 2018-12-12
Supplement: c8ce01931b1.pdf [file c8ce01931b1.pdf]

Electronic supplementary information (ESI)

**From mononuclear to two-dimensional Cobalt(II) complexes  
based on mixed benzimidazole-carboxylate bridges: syntheses,  
structures, and magnetic properties**

Jiao-Jiao Kong, §<sup>a</sup> Dong Shao, §<sup>b</sup> Jia-Chen Zhang, <sup>a</sup> Yu-Xuan Jiang, <sup>a</sup> Cheng-Long  
Ji, <sup>a</sup> Xing-Cai Huang\*<sup>a</sup>

<sup>a</sup> School of Chemistry and Environmental Engineering, Yancheng Teachers  
University, Yancheng, 224007, China.

<sup>b</sup> School of Chemistry and Chemical Engineering, Nanjing University, Nanjing,  
210097, China

§These authors contributed equally.

\* [huangxc82@126.com](mailto:huangxc82@126.com)

***CrystEngComm***

## Table of Contents

|                                                                                                                                                                                                   |    |
|---------------------------------------------------------------------------------------------------------------------------------------------------------------------------------------------------|----|
| <b>Figure S1.</b> The asymmetric unit of <b>1</b> . Hydrogen atoms were omitted for clarity. ....                                                                                                 | 3  |
| <b>Figure S2.</b> The packing structure of <b>1</b> .....                                                                                                                                         | 3  |
| <b>Figure S3.</b> The packing structure of <b>2</b> .....                                                                                                                                         | 4  |
| <b>Figure S4.</b> PXRD patterns of <b>1-3</b> .....                                                                                                                                               | 5  |
| <b>Figure S5.</b> TGA curves of <b>1-3</b> .....                                                                                                                                                  | 6  |
| <b>Table S1.</b> Selected bond lengths (Å) and, angles [°], and structural parameters for 1-3. ...                                                                                                | 7  |
| <b>Figure S6</b> (a) Magnetization curve at 1.8 K for <b>3</b> . (b) The field-cooled (FC) and zero-field-cooled (ZFC) magnetizations curves for <b>3</b> .....                                   | 9  |
| <b>Figure S7.</b> Temperature dependence of the in-phase ( $\chi'$ ) and out-of-phase ( $\chi''$ ) ac susceptibilities measured under zero dc field for <b>3</b> .....                            | 10 |
| <b>Figure S8.</b> Frequency dependence of the in-phase ( $\chi'$ ) and out-of-phase ( $\chi''$ ) ac susceptibilities measured under zero dc field at 1.8 K for <b>1</b> and <b>2</b> . ....       | 11 |
| <b>Figure S9.</b> Temperature dependence of the in-phase ( $\chi'$ ) and out-of-phase ( $\chi''$ ) ac susceptibilities for <b>1</b> under a 1000 Oe dc field.....                                 | 12 |
| <b>Figure S10.</b> Frequency dependence of the in-phase ( $\chi'$ ) and out-of-phase ( $\chi''$ ) ac susceptibilities measured under a 1000 Oe dc field at 1.8 K for <b>2</b> . ....              | 13 |
| <b>Figure S11.</b> Temperature dependence of the in-phase ( $\chi'$ ) and out-of-phase ( $\chi''$ ) ac susceptibilities for <b>2</b> under a 1000 Oe dc field.....                                | 14 |
| <b>Table S2.</b> Relaxation fitting parameters at 1.8 K under different dc fields from the least-square fitting of the Cole-Cole plots of <b>1</b> according to the generalized Debye model. .... | 15 |
| <b>Table S3.</b> Relaxation fitting parameters from the least-square fitting of the Cole-Cole plots of <b>1</b> according to the generalized Debye model.....                                     | 15 |
| <b>Table S4.</b> Relaxation fitting parameters from the least-square fitting of the Cole-Cole plots of <b>2</b> according to the generalized Debye model.....                                     | 15 |
| <b>Table S5.</b> Fitting results to the temperature dependence of the magnetic relaxation time by Direct and Raman mechanism, respectively. ....                                                  | 16 |

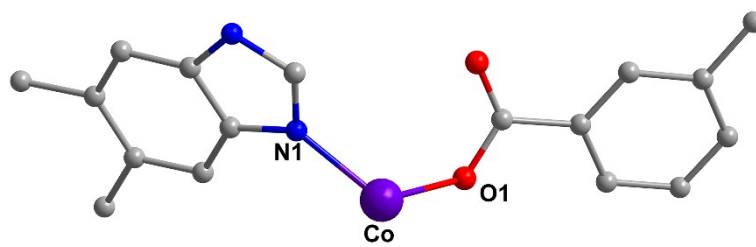

**Figure S1.** The asymmetric unit of **1**. Hydrogen atoms were omitted for clarity.

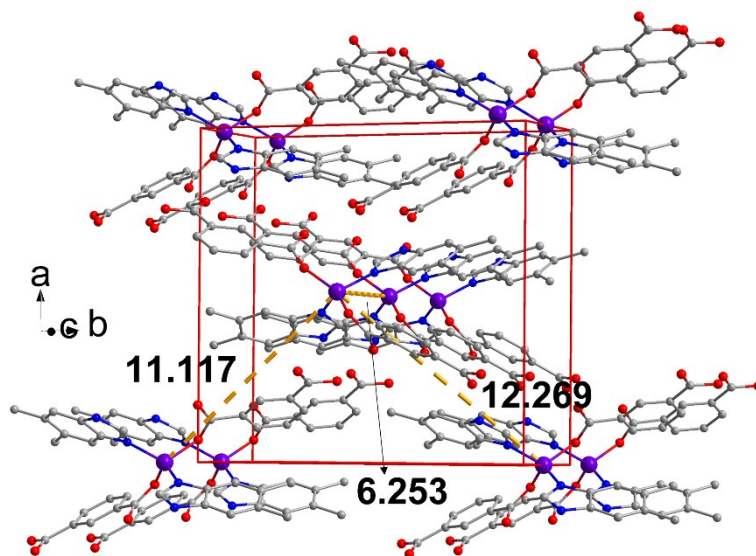

**Figure S2.** The packing structure of **1**.

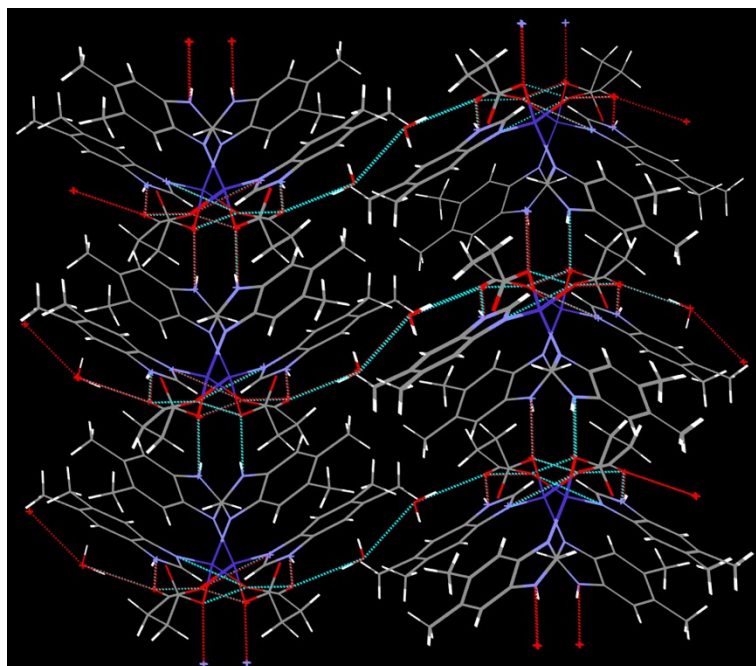

**Figure S3.** The packing structure of **2**.

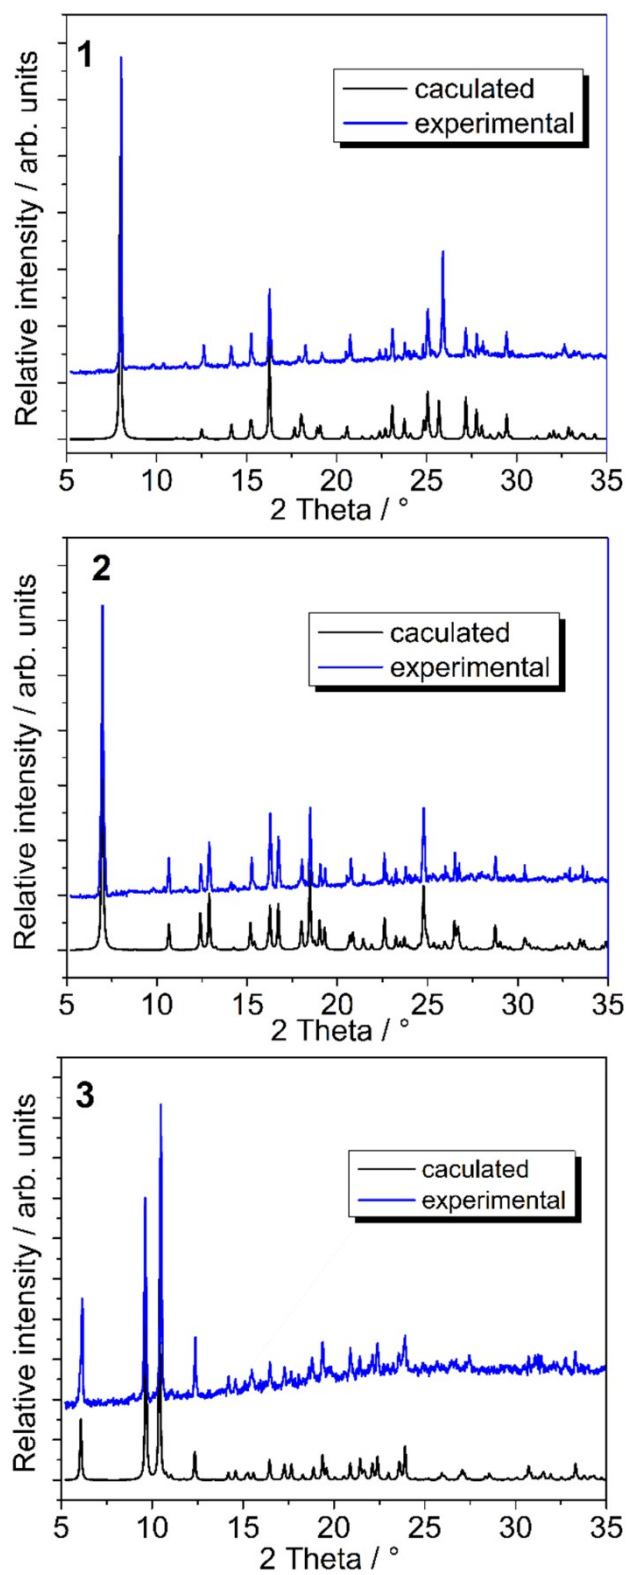

**Figure S4.** PXR D patterns of 1-3.

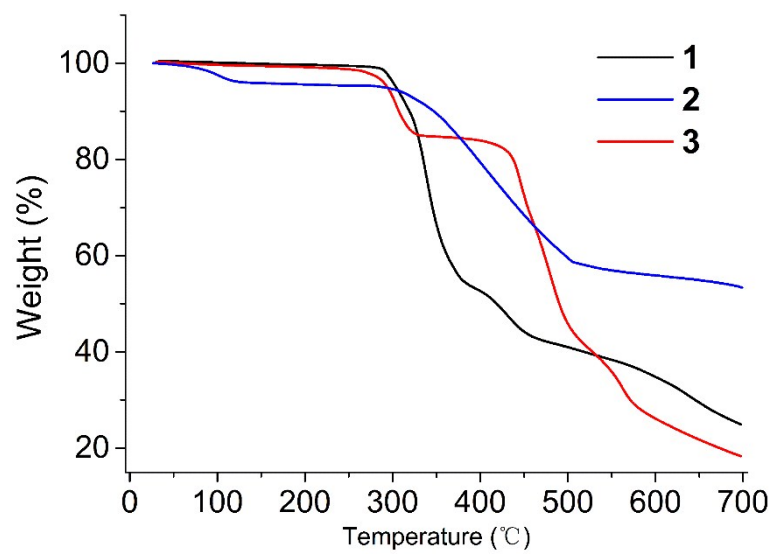

**Figure S5.** TGA curves of **1-3**.

**Table S1.** Selected bond lengths (Å) and, angles [°], and structural parameters for **1-3**.

| <b>1</b>                                                                   |          |                     |            |
|----------------------------------------------------------------------------|----------|---------------------|------------|
| Co(1)-O(1)                                                                 | 1.951(2) | O(1)#1-Co(1)-O(1)   | 99.20(13)  |
| Co(1)-O(1)#1                                                               | 1.951(2) | O(1)#1-Co(1)-N(1)   | 106.99(10) |
| Co(1)-N(1)                                                                 | 2.011(2) | O(1)-Co(1)-N(1)     | 121.78(10) |
| Co(1)-N(1)#1                                                               | 2.011(2) | O(1)#1-Co(1)-N(1)#1 | 121.78(10) |
| Co- $X_{\text{aver}}$ (X = N, O)                                           | 1.981    | O(1)-Co(1)-N(1)#1   | 106.99(10) |
| CShM□                                                                      | 1.275    | N(1)-Co(1)-N(1)#1   | 101.64(14) |
|                                                                            |          | C(10)-O(1)-Co(1)    | 120.22(18) |
| Symmetry transformations used to generate equivalent atoms: #1 -x+1,-y+1,z |          |                     |            |
| □ continuous shape measures calculated by SHAPE 2.0.                       |          |                     |            |

| <b>2</b>                                                                          |          |                   |            |
|-----------------------------------------------------------------------------------|----------|-------------------|------------|
| Co(1)-O(1)                                                                        | 1.963(2) | O(1)-Co(1)-O(3)#1 | 99.73(11)  |
| Co(1)-N(1)                                                                        | 2.005(3) | O(1)-Co(1)-N(2)   | 119.06(11) |
| Co(1)-N(2)                                                                        | 2.003(3) | O(3)#1-Co(1)-N(2) | 111.74(11) |
| Co(1)-O(3)#1                                                                      | 1.980(2) | O(1)-Co(1)-N(1)   | 116.93(11) |
| Co- $X_{\text{aver}}$ (X = N, O)                                                  | 1.987    | O(3)#1-Co(1)-N(1) | 94.63(11)  |
| CShM                                                                              | 1.008    | N(2)-Co(1)-N(1)   | 111.04(12) |
|                                                                                   |          | C(1)-O(1)-Co(1)   | 124.8(2)   |
| Symmetry transformations used to generate equivalent atoms: #1 x-1/2,-y+3/2,z-1/2 |          |                   |            |

| <b>3</b>                         |            |                   |           |
|----------------------------------|------------|-------------------|-----------|
| Co(1)-O(1)                       | 1.9593(15) | O(1)-Co(1)-O(6)#1 | 110.89(7) |
| Co(1)-O(6)#1                     | 1.9866(15) | O(1)-Co(1)-N(1)   | 109.69(7) |
| Co(1)-N(1)                       | 2.0083(18) | O(6)#1-Co(1)-N(1) | 94.02(7)  |
| Co(1)-O(2)                       | 2.0101(13) | O(1)-Co(1)-O(2)   | 112.21(6) |
| Co- $X_{\text{aver}}$ (X = N, O) | 1.991      | O(6)#1-Co(1)-O(2) | 96.55(6)  |

|                                                                                                                                   |            |                     |            |
|-----------------------------------------------------------------------------------------------------------------------------------|------------|---------------------|------------|
| CShM□                                                                                                                             |            | N(1)-Co(1)-O(2)     | 129.31(7)  |
| Co(2)-O(5)#2                                                                                                                      | 2.0391(14) | O(5)#2-Co(2)-O(5)   | 180.0      |
| Co(2)-O(5)                                                                                                                        | 2.0391(14) | O(5)#2-Co(2)O(4)#3  | 84.78(6)   |
| Co(2)-O(4)#3                                                                                                                      | 2.0667(14) | O(5)-Co(2)-O(4)#3   | 95.22(6)   |
| Co(2)-O(4)#4                                                                                                                      | 2.0667(14) | O(5)#2-Co(2)-O(4)#4 | 95.22(6)   |
| Co(2)-O(2)#4                                                                                                                      | 2.1983(14) | O(5)-Co(2)-O(4)#4   | 84.78(6)   |
| Co(2)-O(2)#3                                                                                                                      | 2.1983(14) | O(4)#3-Co(2)-O(4)#4 | 180.00(11) |
| Co-O <sub>aver</sub>                                                                                                              | 2.101      | O(5)#2-Co(2)-O(2)#4 | 90.15(6)   |
| CShM                                                                                                                              |            | O(5)-Co(2)-O(2)#4   | 89.85(6)   |
|                                                                                                                                   |            | O(4)#3-Co(2)-O(2)#4 | 88.26(6)   |
|                                                                                                                                   |            | O(4)#4-Co(2)-O(2)#4 | 91.74(6)   |
|                                                                                                                                   |            | O(5)#2-Co(2)-O(2)#3 | 89.85(6)   |
|                                                                                                                                   |            | O(5)-Co(2)-O(2)#3   | 90.15(6)   |
|                                                                                                                                   |            | O(4)#3-Co(2)-O(2)#3 | 91.74(6)   |
|                                                                                                                                   |            | O(4)#4-Co(2)-O(2)#3 | 88.26(6)   |
| Symmetry transformations used to generate equivalent atoms: #1 x,-y+1/2,z+1/2; #2 -x,-y,-z; #3 x,-y+1/2,z-1/2; #4 -x,y-1/2,-z+1/2 |            |                     |            |



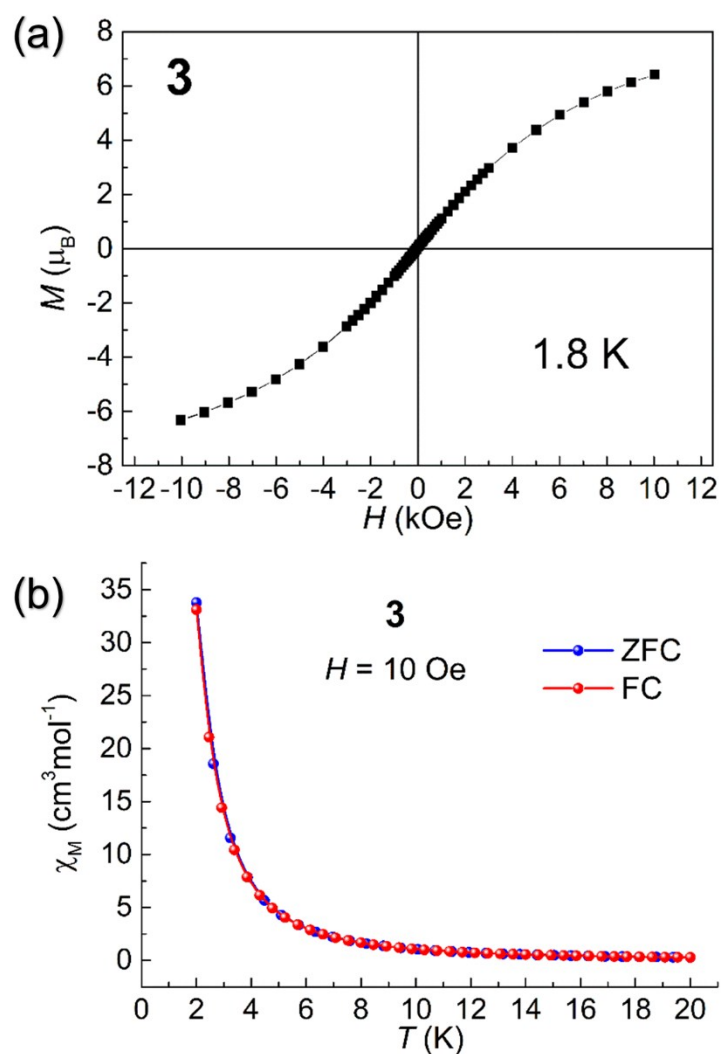

**Figure S6** (a) Magnetization curve at 1.8 K for **3**. (b) The field-cooled (FC) and zero-field-cooled (ZFC) magnetizations curves for **3**.

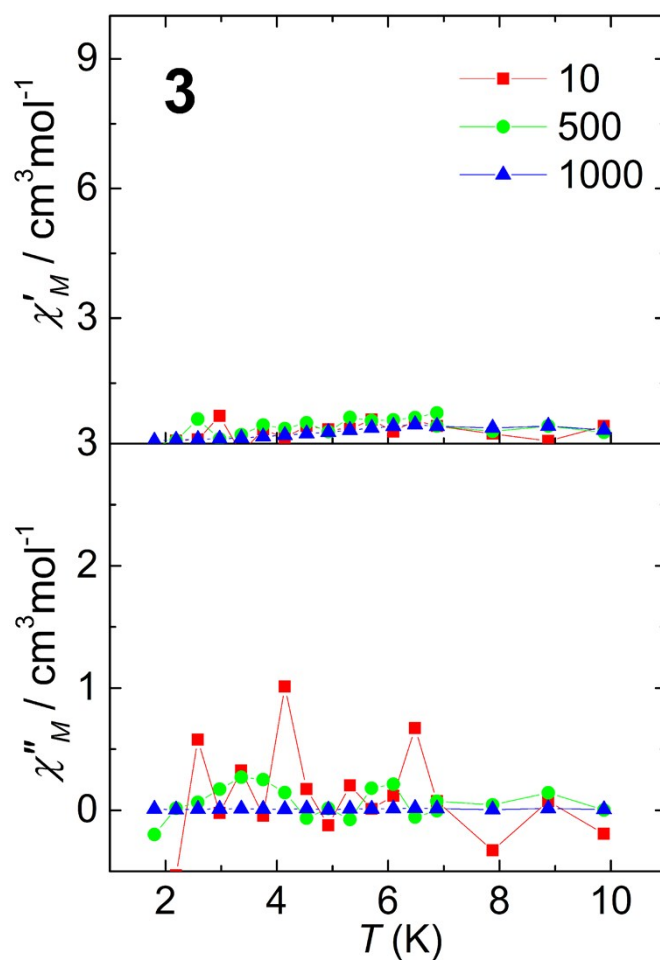

**Figure S7.** Temperature dependence of the in-phase ( $\chi'$ ) and out-of-phase ( $\chi''$ ) ac susceptibilities measured under zero dc field for **3**.

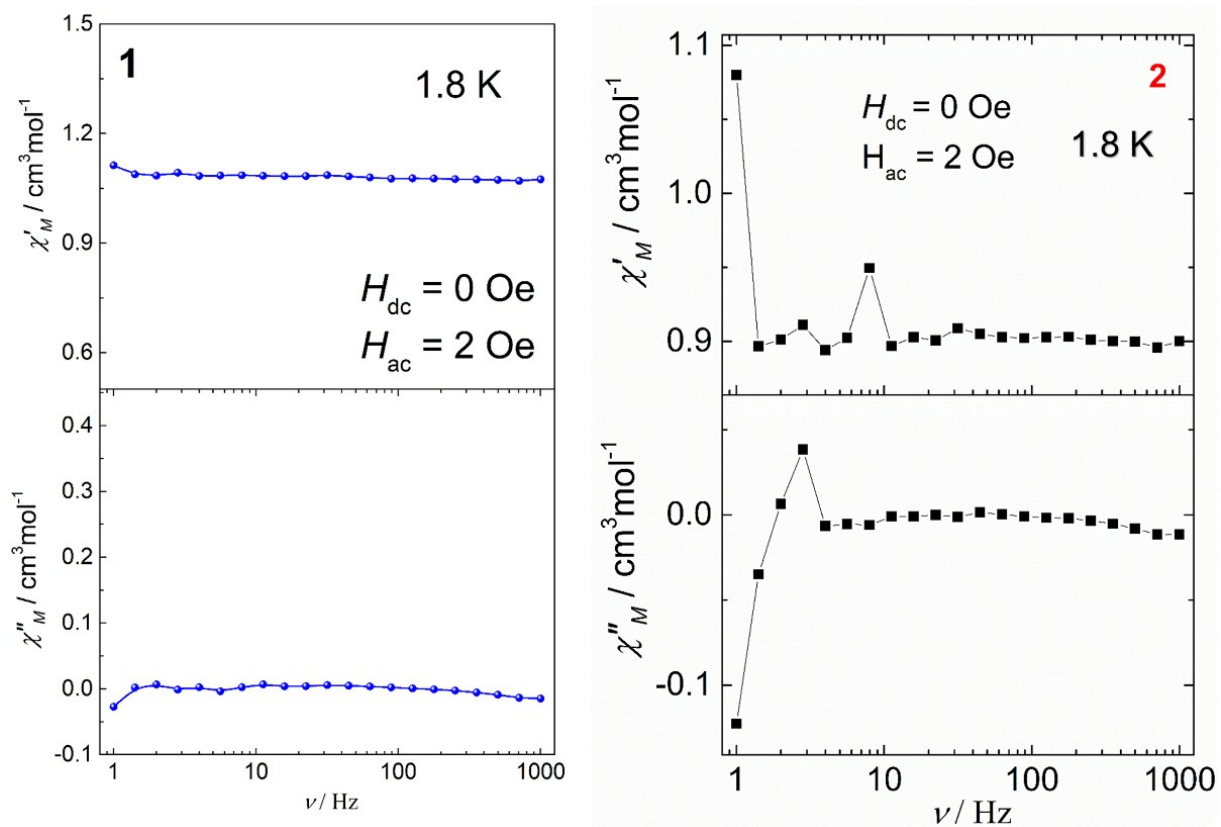

**Figure S8.** Frequency dependence of the in-phase ( $\chi'$ ) and out-of-phase ( $\chi''$ ) ac susceptibilities measured under zero dc field at 1.8 K for **1** and **2**.

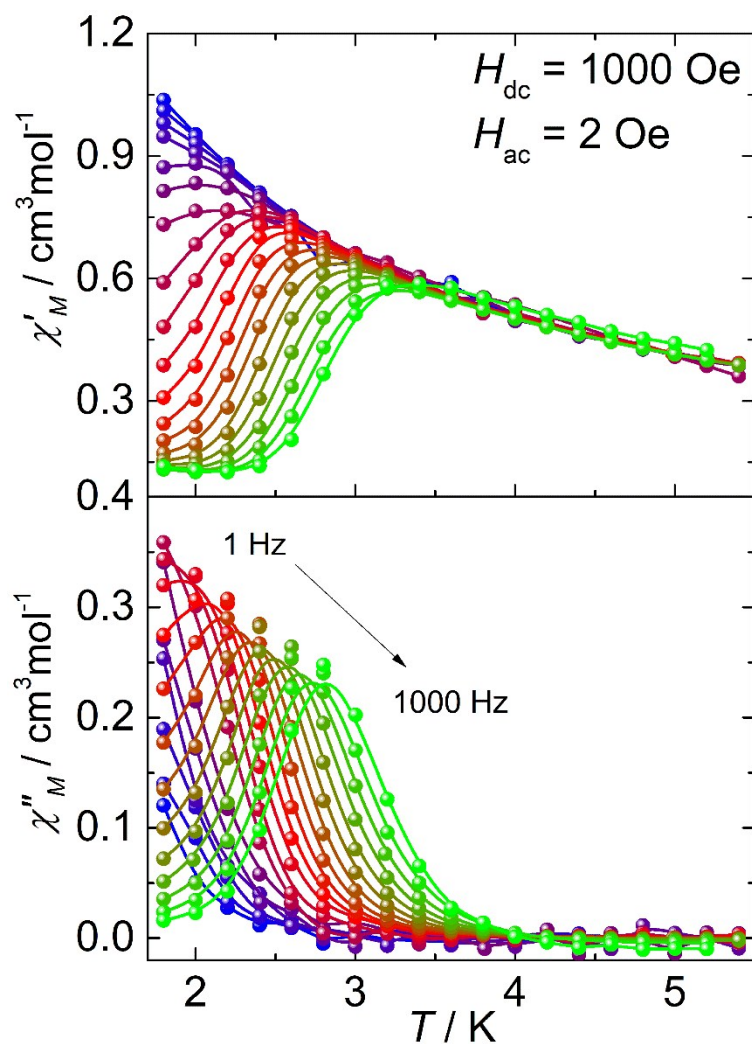

**Figure S9.** Temperature dependence of the in-phase ( $\chi'$ ) and out-of-phase ( $\chi''$ ) ac susceptibilities for **1** under a 1000 Oe dc field.

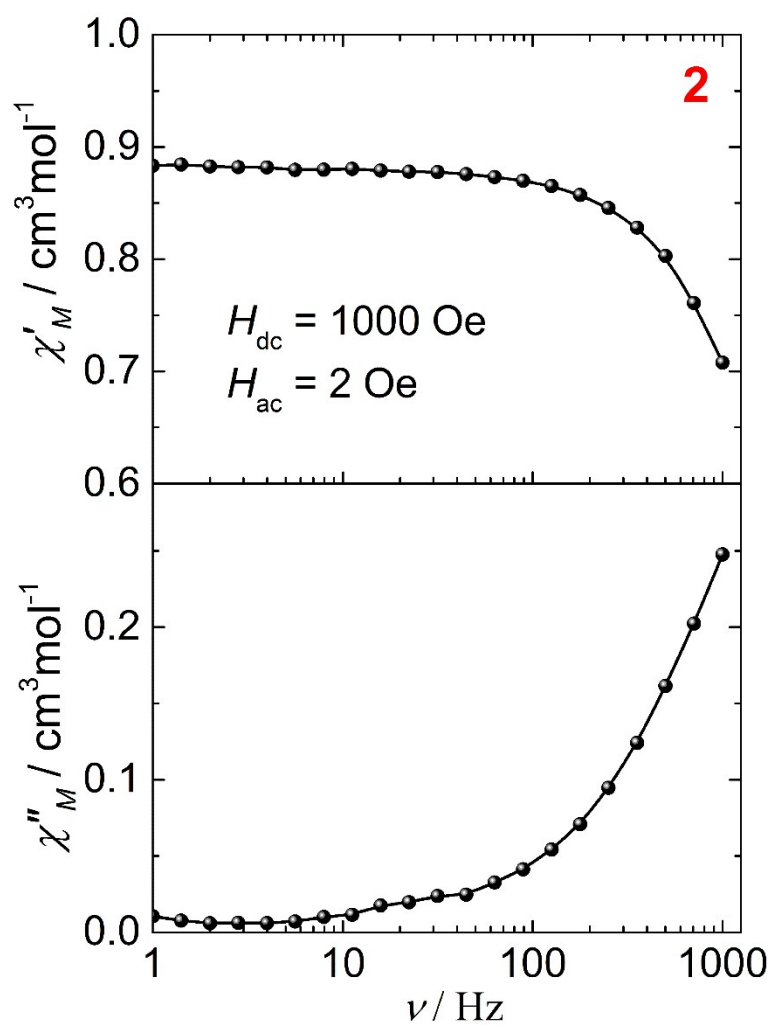

**Figure S10.** Frequency dependence of the in-phase ( $\chi'$ ) and out-of-phase ( $\chi''$ ) ac susceptibilities measured under a 1000 Oe dc field at 1.8 K for **2**.

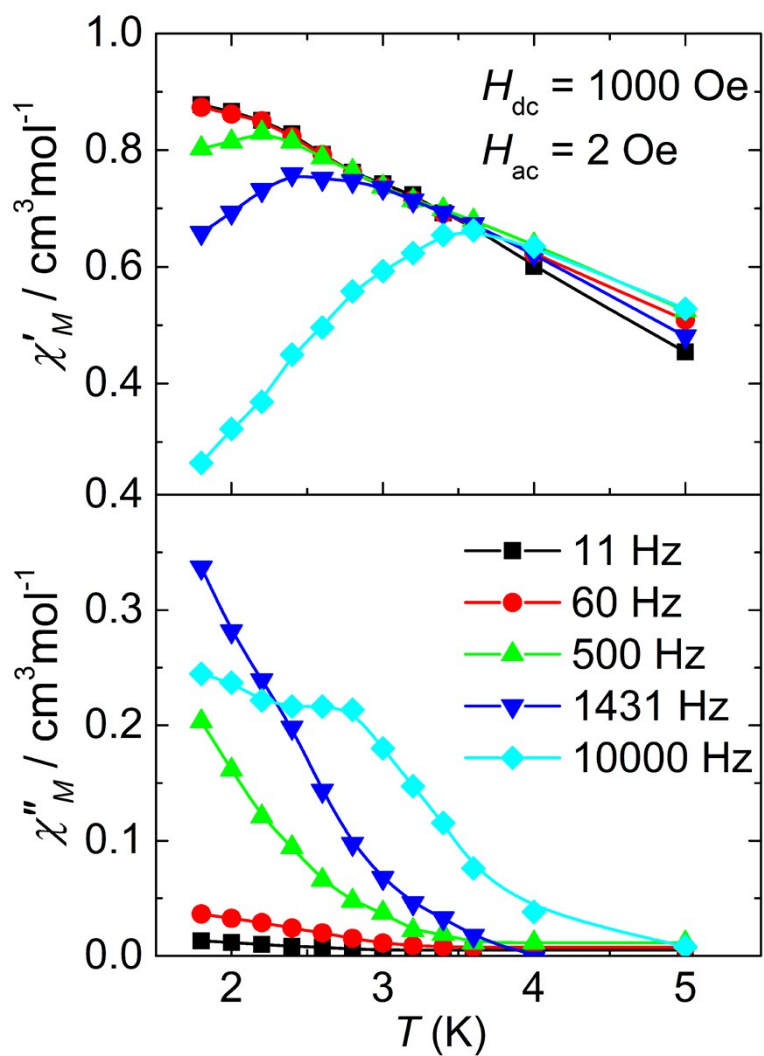

**Figure S11.** Temperature dependence of the in-phase ( $\chi'$ ) and out-of-phase ( $\chi''$ ) ac susceptibilities for **2** under a 1000 Oe dc field.

**Table S2.** Relaxation fitting parameters at 1.8 K under different dc fields from the least-square fitting of the Cole-Cole plots of **1** according to the generalized Debye model.

| $H / \text{Oe}$ | $\chi_S / \text{cm}^3\text{mol}^{-1}\text{K}$ | $\chi_T / \text{cm}^3\text{mol}^{-1}\text{K}$ | $\tau / \text{s}$ | $\alpha$ |
|-----------------|-----------------------------------------------|-----------------------------------------------|-------------------|----------|
| 100             | 0.99712                                       | 1.09803                                       | 0.00769           | 0.2168   |
| 200             | 0.74952                                       | 1.09397                                       | 0.00859           | 0.12802  |
| 400             | 0.37771                                       | 1.08569                                       | 0.01036           | 0.15719  |
| 600             | 0.22675                                       | 1.09895                                       | 0.01192           | 0.14894  |
| 800             | 0.13861                                       | 1.08817                                       | 0.01329           | 0.17876  |
| 1000            | 0.13049                                       | 1.0462                                        | 0.0136            | 0.10567  |
| 1200            | 0.09234                                       | 1.02236                                       | 0.01323           | 0.18174  |
| 1400            | 0.08768                                       | 1.04978                                       | 0.01263           | 0.14699  |
| 1600            | 0.07131                                       | 0.98656                                       | 0.01188           | 0.13994  |
| 1800            | 0.06351                                       | 0.95474                                       | 0.01088           | 0.13945  |

**Table S3.** Relaxation fitting parameters from the least-square fitting of the Cole-Cole plots of **1** according to the generalized Debye model.

| $T / \text{K}$ | $\chi_S / \text{cm}^3\text{mol}^{-1}\text{K}$ | $\chi_T / \text{cm}^3\text{mol}^{-1}\text{K}$ | $\tau / \text{s}$ | $\alpha$ |
|----------------|-----------------------------------------------|-----------------------------------------------|-------------------|----------|
| 1.8            | 0.06112                                       | 0.79145                                       | 0.00132           | 0.1737   |
| 1.9            | 0.05171                                       | 0.75523                                       | 0.00117           | 0.17563  |
| 2              | 0.05218                                       | 0.71687                                       | 0.00102           | 0.16234  |
| 2.2            | 0.05                                          | 0.66094                                       | 8.19952E-4        | 0.15492  |
| 2.4            | 0.06                                          | 0.60896                                       | 6.63738E-4        | 0.13177  |
| 2.6            | 0.06                                          | 0.5755                                        | 5.49856E-4        | 0.11211  |
| 2.8            | 0.07311                                       | 0.53884                                       | 4.56748E-4        | 0.07268  |
| 3.0            | 0.09066                                       | 0.50411                                       | 3.8486E-4         | 0.02963  |
| 3.2            | 0.11002                                       | 0.48229                                       | 3.30516E-4        | 0.006    |
| 3.4            | 0.14065                                       | 0.45959                                       | 2.83575E-4        | 0.00269  |

**Table S4.** Relaxation fitting parameters from the least-square fitting of the Cole-Cole plots of **2** according to the generalized Debye model.

| $T / \text{K}$ | $\chi_S / \text{cm}^3\text{mol}^{-1}\text{K}$ | $\chi_T / \text{cm}^3\text{mol}^{-1}\text{K}$ | $\tau / \text{s}$ | $\alpha$ |
|----------------|-----------------------------------------------|-----------------------------------------------|-------------------|----------|
| 1.8            | 0.16461                                       | 0.89471                                       | 6E-5              | 0.1312   |
| 2.0            | 0.22008                                       | 0.88548                                       | 6E-5              | 0.15359  |
| 2.2            | 0.45995                                       | 0.99321                                       | 5E-5              | 0.1003   |
| 2.4            | 0.35065                                       | 0.83106                                       | 4E-5              | 0.05832  |
| 2.6            | 0.4001                                        | 0.80252                                       | 3E-5              | 0.00932  |
| 2.8            | 0.45046                                       | 0.76975                                       | 2E-5              | 0.0051   |

**Table S5.** Fitting results to the temperature dependence of the magnetic relaxation time by Direct and Raman mechanism, respectively.

| Compound | Direct      | Raman               |
|----------|-------------|---------------------|
| <b>1</b> | $A = 1935$  | $C = 2.9; n = 9$    |
| <b>2</b> | $A = 55036$ | $C = 0.02; n = 2.2$ |
